# Supplementary material for: The pattern of gestational weight gains among Chinese women: a repeated measure analysis
Source: PubMed Central journal article supplement (PMC6203785; doi:10.1038/s41598-018-34227-8), 2018-10-26
Supplement: 41598_2018_34227_MOESM1_ESM.pdf [file 41598_2018_34227_MOESM1_ESM.pdf]

# **The pattern of gestational weight gains among Chinese women: a repeated measure analysis**

Jing Tan,<sup>1</sup> Yan Ren,<sup>1</sup> Yana Qi,<sup>1</sup> Peng Chen,<sup>2</sup> Li Tang,<sup>1</sup> Guolin He,<sup>2</sup> Sheyu Li,<sup>3</sup> Xin Sun,<sup>1\*</sup> Xinghui Liu<sup>2\*</sup>

## **Affiliations**

<sup>1</sup> Chinese Evidence-based Medicine Center and CREAT Group, West China Hospital, Sichuan University, Chengdu, China

<sup>2</sup> West China Women and Children's Hospital, Sichuan University, Chengdu, China

<sup>3</sup> Department of Endocrinology and Metabolism, West China Hospital, Sichuan University, Chengdu, China

## **Corresponding author**

Xinghui Liu and Xin Sun

Address: No.20, Section 3, Renmin South Road, Chengdu, China;

No.37 Guo Xue Xiang, Chengdu, China

Telephone: +86 13881883798; +86 18980606047

E-mail: xinghui.liu@163.com; sunx79@hotmail.com

## **Supplementary Information**

**Table S1-S3** Smoothed percentiles of GWG for pregnant women with pre-pregnancy underweight (BMI <18.50 kg/m<sup>2</sup>), normal weight (BMI 18.50-22.99 kg/m<sup>2</sup>) and overweight (BMI 23.00-27.49 kg/m<sup>2</sup>), respectively.

**Table S4** Sensitivity analysis of the ranges and rates of GWG stratified by pre-pregnancy BMI categories

**Table S5** The ranges and rates of GWG using the IOM standard for pre-pregnancy

**Figure S1(Figure S1a, S1b, S1c)** The 5th (bottom dashed line), 50th (middle), and 95th (top) estimated trajectories for GWG among underweight (a), normal (b), overweight (c) women. Large blue circles show empirical values at each gestational week. Small grey circles represent actual observations

**Table S1 Smoothed percentiles for GWG for women with pre-pregnancy underweight (BMI <18.50) according to gestational age**

| Gestational age (weeks) | No of measures | Percentiles for GWF (kg) |       |       |       |       |
|-------------------------|----------------|--------------------------|-------|-------|-------|-------|
|                         |                | 5th                      | 25th  | 50th  | 75th  | 95th  |
| 10                      | 23             | -1.01                    | -0.46 | -0.08 | 0.30  | 0.85  |
| 11                      | 120            | -1.21                    | -0.46 | 0.05  | 0.57  | 1.32  |
| 12                      | 267            | -1.42                    | -0.47 | 0.18  | 0.84  | 1.79  |
| 13                      | 216            | -1.62                    | -0.48 | 0.32  | 1.11  | 2.25  |
| 14                      | 166            | -1.83                    | -0.48 | 0.45  | 1.38  | 2.72  |
| 15                      | 165            | -1.37                    | 0.06  | 1.05  | 2.04  | 3.47  |
| 16                      | 219            | -0.91                    | 0.61  | 1.66  | 2.70  | 4.22  |
| 17                      | 213            | -0.45                    | 1.15  | 2.26  | 3.37  | 4.97  |
| 18                      | 195            | 0.01                     | 1.70  | 2.86  | 4.03  | 5.72  |
| 19                      | 153            | 0.47                     | 2.24  | 3.47  | 4.69  | 6.47  |
| 20                      | 161            | 0.93                     | 2.79  | 4.07  | 5.36  | 7.22  |
| 21                      | 182            | 1.38                     | 3.33  | 4.67  | 6.02  | 7.96  |
| 22                      | 168            | 1.84                     | 3.88  | 5.28  | 6.68  | 8.71  |
| 23                      | 162            | 2.30                     | 4.42  | 5.88  | 7.34  | 9.46  |
| 24                      | 174            | 2.76                     | 4.96  | 6.49  | 8.01  | 10.21 |
| 25                      | 273            | 3.22                     | 5.51  | 7.09  | 8.67  | 10.96 |
| 26                      | 162            | 3.68                     | 6.05  | 7.69  | 9.33  | 11.71 |
| 27                      | 178            | 4.14                     | 6.60  | 8.30  | 10.00 | 12.46 |
| 28                      | 245            | 4.60                     | 7.14  | 8.90  | 10.66 | 13.21 |
| 29                      | 223            | 5.06                     | 7.69  | 9.51  | 11.32 | 13.95 |
| 30                      | 324            | 5.52                     | 8.23  | 10.11 | 11.99 | 14.70 |
| 31                      | 321            | 5.97                     | 8.78  | 10.71 | 12.65 | 15.45 |
| 32                      | 316            | 6.43                     | 9.32  | 11.32 | 13.31 | 16.20 |
| 33                      | 270            | 6.89                     | 9.87  | 11.92 | 13.98 | 16.95 |
| 34                      | 419            | 7.35                     | 10.41 | 12.52 | 14.64 | 17.70 |
| 35                      | 405            | 7.81                     | 10.96 | 13.13 | 15.30 | 18.45 |
| 36                      | 573            | 8.27                     | 11.50 | 13.73 | 15.96 | 19.20 |
| 37                      | 658            | 8.56                     | 11.85 | 14.12 | 16.39 | 19.68 |
| 38                      | 589            | 8.85                     | 12.20 | 14.51 | 16.82 | 20.17 |
| 39                      | 302            | 9.13                     | 12.54 | 14.90 | 17.25 | 20.66 |
| 40                      | 82             | 9.42                     | 12.89 | 15.29 | 17.68 | 21.15 |

**Abbreviations:** GWG, gestational weight gain; BMI, body mass index

**Table S2 Smoothed percentiles for GWG for women with pre-pregnancy normal weight (BMI 18.50-22.99) according to gestational age**

| Gestational age (weeks) | No of measures | Percentiles for GWF (kg) |       |       |       |       |
|-------------------------|----------------|--------------------------|-------|-------|-------|-------|
|                         |                | 5th                      | 25th  | 50th  | 75th  | 95th  |
| 10                      | 113            | -0.77                    | -0.39 | -0.13 | 0.14  | 0.52  |
| 11                      | 519            | -0.98                    | -0.40 | 0.01  | 0.41  | 1.00  |
| 12                      | 1278           | -1.20                    | -0.41 | 0.14  | 0.69  | 1.48  |
| 13                      | 1074           | -1.41                    | -0.41 | 0.28  | 0.97  | 1.97  |
| 14                      | 783            | -1.63                    | -0.42 | 0.41  | 1.24  | 2.45  |
| 15                      | 799            | -1.19                    | 0.10  | 1.00  | 1.89  | 3.19  |
| 16                      | 926            | -0.75                    | 0.63  | 1.59  | 2.55  | 3.93  |
| 17                      | 1027           | -0.32                    | 1.16  | 2.18  | 3.20  | 4.67  |
| 18                      | 919            | 0.12                     | 1.69  | 2.77  | 3.85  | 5.41  |
| 19                      | 694            | 0.56                     | 2.21  | 3.36  | 4.50  | 6.15  |
| 20                      | 683            | 1.00                     | 2.74  | 3.95  | 5.15  | 6.90  |
| 21                      | 824            | 1.44                     | 3.27  | 4.54  | 5.80  | 7.64  |
| 22                      | 865            | 1.87                     | 3.80  | 5.13  | 6.45  | 8.38  |
| 23                      | 715            | 2.31                     | 4.33  | 5.72  | 7.11  | 9.12  |
| 24                      | 873            | 2.75                     | 4.85  | 6.31  | 7.76  | 9.86  |
| 25                      | 1164           | 3.19                     | 5.38  | 6.89  | 8.41  | 10.60 |
| 26                      | 751            | 3.63                     | 5.91  | 7.48  | 9.06  | 11.34 |
| 27                      | 779            | 4.07                     | 6.44  | 8.07  | 9.71  | 12.08 |
| 28                      | 1214           | 4.50                     | 6.96  | 8.66  | 10.36 | 12.82 |
| 29                      | 1015           | 4.94                     | 7.49  | 9.25  | 11.01 | 13.56 |
| 30                      | 1457           | 5.38                     | 8.02  | 9.84  | 11.66 | 14.30 |
| 31                      | 1443           | 5.82                     | 8.55  | 10.43 | 12.32 | 15.04 |
| 32                      | 1520           | 6.26                     | 9.07  | 11.02 | 12.97 | 15.79 |
| 33                      | 1212           | 6.70                     | 9.60  | 11.61 | 13.62 | 16.53 |
| 34                      | 1984           | 7.13                     | 10.13 | 12.20 | 14.27 | 17.27 |
| 35                      | 1952           | 7.57                     | 10.66 | 12.79 | 14.92 | 18.01 |
| 36                      | 2731           | 8.01                     | 11.19 | 13.38 | 15.57 | 18.75 |
| 37                      | 3006           | 8.31                     | 11.54 | 13.77 | 16.00 | 19.24 |
| 38                      | 2723           | 8.60                     | 11.89 | 14.16 | 16.44 | 19.73 |
| 39                      | 1534           | 8.90                     | 12.25 | 14.56 | 16.87 | 20.21 |
| 40                      | 474            | 9.20                     | 12.60 | 14.95 | 17.30 | 20.70 |

**Abbreviations:** GWG, gestational weight gain; BMI, body mass index

**Table S3 Smoothed percentiles for GWG for women with pre-pregnancy overweight (BMI 23.00-27.49) according to gestational age**

| Gestational age (weeks) | No of measures | Percentiles for GWF (kg) |       |       |       |       |
|-------------------------|----------------|--------------------------|-------|-------|-------|-------|
|                         |                | 5th                      | 25th  | 50th  | 75th  | 95th  |
| 10                      | 8              | -1.82                    | -0.80 | -0.10 | 0.61  | 1.63  |
| 11                      | 37             | -1.79                    | -0.70 | 0.05  | 0.81  | 1.89  |
| 12                      | 89             | -1.75                    | -0.59 | 0.21  | 1.01  | 2.16  |
| 13                      | 76             | -1.72                    | -0.49 | 0.36  | 1.20  | 2.43  |
| 14                      | 67             | -1.69                    | -0.39 | 0.51  | 1.40  | 2.70  |
| 15                      | 59             | -1.30                    | 0.09  | 1.05  | 2.01  | 3.41  |
| 16                      | 77             | -0.92                    | 0.57  | 1.60  | 2.63  | 4.11  |
| 17                      | 67             | -0.53                    | 1.05  | 2.14  | 3.24  | 4.82  |
| 18                      | 62             | -0.14                    | 1.53  | 2.69  | 3.85  | 5.53  |
| 19                      | 50             | 0.24                     | 2.01  | 3.24  | 4.46  | 6.23  |
| 20                      | 54             | 0.63                     | 2.49  | 3.78  | 5.07  | 6.94  |
| 21                      | 51             | 1.01                     | 2.97  | 4.33  | 5.68  | 7.64  |
| 22                      | 65             | 1.40                     | 3.46  | 4.88  | 6.29  | 8.35  |
| 23                      | 52             | 1.79                     | 3.94  | 5.42  | 6.91  | 9.06  |
| 24                      | 80             | 2.17                     | 4.42  | 5.97  | 7.52  | 9.76  |
| 25                      | 76             | 2.56                     | 4.90  | 6.51  | 8.13  | 10.47 |
| 26                      | 47             | 2.94                     | 5.38  | 7.06  | 8.74  | 11.17 |
| 27                      | 56             | 3.33                     | 5.86  | 7.61  | 9.35  | 11.88 |
| 28                      | 105            | 3.72                     | 6.34  | 8.15  | 9.96  | 12.59 |
| 29                      | 77             | 4.10                     | 6.82  | 8.70  | 10.57 | 13.29 |
| 31                      | 111            | 4.49                     | 7.30  | 9.24  | 11.19 | 14.00 |
| 32                      | 107            | 4.87                     | 7.78  | 9.79  | 11.80 | 14.70 |
| 33                      | 95             | 5.26                     | 8.26  | 10.34 | 12.41 | 15.41 |
| 34                      | 151            | 5.65                     | 8.74  | 10.88 | 13.02 | 16.12 |
| 35                      | 134            | 6.03                     | 9.22  | 11.43 | 13.63 | 16.82 |
| 36                      | 208            | 6.42                     | 9.70  | 11.97 | 14.24 | 17.53 |
| 37                      | 225            | 6.80                     | 10.19 | 12.52 | 14.85 | 18.23 |
| 38                      | 205            | 7.11                     | 10.57 | 12.95 | 15.34 | 18.80 |
| 39                      | 97             | 7.42                     | 10.95 | 13.39 | 15.83 | 19.36 |
| 40                      | 32             | 7.72                     | 11.33 | 13.82 | 16.32 | 19.92 |

**Abbreviations:** GWG, gestational weight gain; BMI, body mass index

**Table S4 Sensitivity analysis of the ranges and rates of GWG stratified by pre-pregnancy BMI categories**

| <b>Pre-pregnancy BMI Category</b> | <b>P<sub>25</sub>-P<sub>75</sub> GWG (kg)</b> | <b>P<sub>5</sub>-P<sub>95</sub> GWG (kg)</b> | <b>Rates of GWG at 10-14 weeks (kg/month)</b> | <b>Rates of GWG at 14-36 weeks (kg/month)</b> | <b>Rates of GWG after 36 weeks (kg/month)</b> |
|-----------------------------------|-----------------------------------------------|----------------------------------------------|-----------------------------------------------|-----------------------------------------------|-----------------------------------------------|
| Underweight                       | 12.7-17.5                                     | 9.2-20.9                                     | 0.58                                          | 2.63                                          | 1.69                                          |
| Normal weight                     | 12.4-17.1                                     | 9.0-20.5                                     | 0.59                                          | 2.56                                          | 1.71                                          |
| Overweight                        | 11.4-16.6                                     | 7.7-20.3                                     | 0.65                                          | 2.37                                          | 1.89                                          |

**Note:** We adjusted for the influence of maternal age, education level, gravidity, parity and use of IVF.

**Abbreviations:** GWG, gestational weight gain; BMI, body mass index; IVF, in vitro fertilization

**Table S5** The ranges and rates of GWG using the IOM standard for pre-pregnancy

| <b>Pre-pregnancy BMI Category</b> | <b>P<sub>25</sub>-P<sub>75</sub> GWG (kg)</b> | <b>P<sub>5</sub>-P<sub>95</sub> GWG (kg)</b> | <b>Rates of GWG at 10-14 weeks (kg/month)</b> | <b>Rates of GWG at 14-36 weeks (kg/month)</b> | <b>Rates of GWG after 36 weeks (kg/month)</b> |
|-----------------------------------|-----------------------------------------------|----------------------------------------------|-----------------------------------------------|-----------------------------------------------|-----------------------------------------------|
| Underweight                       | 12.9-17.7                                     | 9.4-21.1                                     | 0.53                                          | 2.42                                          | 1.55                                          |
| Normal weight                     | 12.5-17.3                                     | 9.0-20.8                                     | 0.56                                          | 2.34                                          | 1.58                                          |
| Overweight                        | 11.1-15.6                                     | 7.9-18.8                                     | 0.35                                          | 2.01                                          | 1.86                                          |

**Notes:** IOM BMI standard is used for developing the ranges and rates of GWG, and the pre-pregnancy BMI cut-offs for underweight, normal weight and overweight are  $< 18.5 \text{ kg/m}^2$ ,  $18.5\text{-}24.9 \text{ kg/m}^2$ ,  $25.0\text{-}29.9 \text{ kg/m}^2$  respectively.

**Abbreviations:** GWG, gestational weight gain; BMI, body mass index

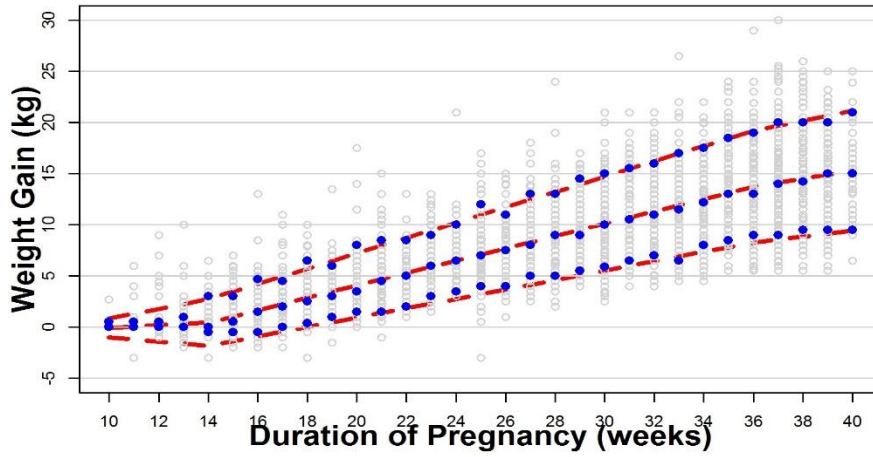

Figure S1a

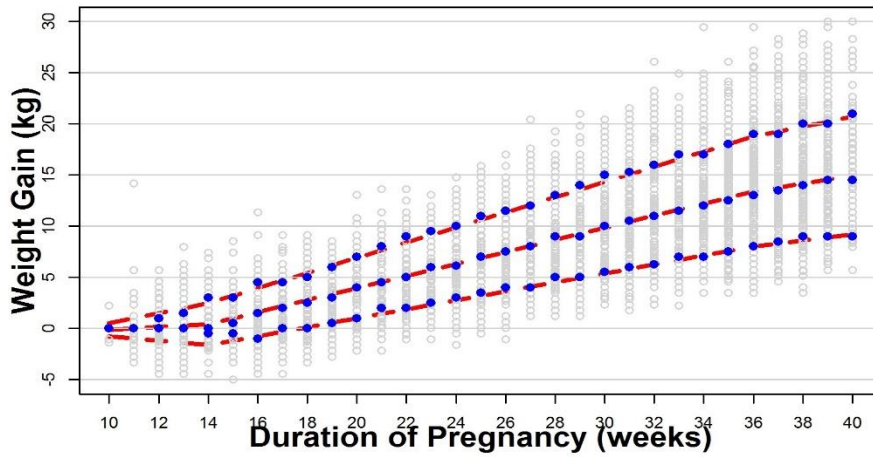

Figure S1b

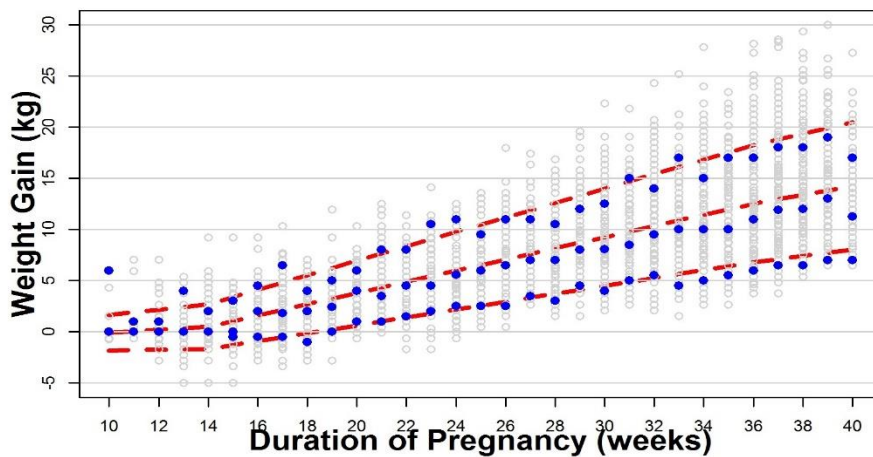

Figure S1c

Figure S1 The 5th (bottom dashed line), 50th (middle), and 95th (top) estimated trajectories for GWG among underweight (a), normal (b), overweight (c) women. Large blue circles show empirical values at each gestational week. Small grey circles represent actual observations
